# Supplementary material for: Chronic Mild Stress and Venlafaxine Treatment Were Associated with Altered Expression Level and Methylation Status of New Candidate Inflammatory Genes in PBMCs and Brain Structures of Wistar Rats
Source: MDPI journal article supplement (doi:10.3390/genes12050667), 2021-04-29
Supplement: s1 [file s1]

**Table S1.** The effect of CMS procedure and venlafaxine on the body weights of the animals

| Group    | Treatment    | Weeks    | Body weights (g) | Weeks  | Body weights (g) | Weeks  | Body weights (g) |
|----------|--------------|----------|------------------|--------|------------------|--------|------------------|
| Control  | No treatment | Baseline | 335              | Week 2 | 345              |        |                  |
| Control  | No treatment | Baseline | 350              | Week 2 | 365              |        |                  |
| Control  | No treatment | Baseline | 375              | Week 2 | 385              |        |                  |
| Control  | No treatment | Baseline | 335              | Week 2 | 345              |        |                  |
| Control  | No treatment | Baseline | 340              | Week 2 | 350              |        |                  |
| Control  | No treatment | Baseline | 370              | Week 2 | 380              |        |                  |
| Stressed | No treatment | Baseline | 315              | Week 2 | 320              |        |                  |
| Stressed | No treatment | Baseline | 375              | Week 2 | 375              |        |                  |
| Stressed | No treatment | Baseline | 380              | Week 2 | 380              |        |                  |
| Stressed | No treatment | Baseline | 315              | Week 2 | 315              |        |                  |
| Stressed | No treatment | Baseline | 370              | Week 2 | 370              |        |                  |
| Stressed | No treatment | Baseline | 305              | Week 2 | 310              |        |                  |
| Stressed | Saline       | Baseline | 330              | Week 2 | 340              | Week 7 | 355              |
| Stressed | Saline       | Baseline | 335              | Week 2 | 335              | Week 7 | 355              |
| Stressed | Saline       | Baseline | 325              | Week 2 | 320              | Week 7 | 345              |
| Stressed | Saline       | Baseline | 315              | Week 2 | 315              | Week 7 | 330              |
| Stressed | Saline       | Baseline | 325              | Week 2 | 325              | Week 7 | 340              |
| Stressed | Saline       | Baseline | 345              | Week 2 | 350              | Week 7 | 365              |
| Control  | Venlafaxine  | Baseline | 355              | Week 2 | 370              | Week 7 | 395              |
| Control  | Venlafaxine  | Baseline | 325              | Week 2 | 345              | Week 7 | 365              |
| Control  | Venlafaxine  | Baseline | 320              | Week 2 | 330              | Week 7 | 345              |
| Control  | Venlafaxine  | Baseline | 330              | Week 2 | 345              | Week 7 | 360              |
| Control  | Venlafaxine  | Baseline | 360              | Week 2 | 380              | Week 7 | 390              |
| Control  | Venlafaxine  | Baseline | 320              | Week 2 | 330              | Week 7 | 350              |
| Stressed | Venlafaxine  | Baseline | 330              | Week 2 | 330              | Week 7 | 345              |

|          |             |          |     |        |     |        |     |
|----------|-------------|----------|-----|--------|-----|--------|-----|
| Stressed | Venlafaxine | Baseline | 320 | Week 2 | 325 | Week 7 | 325 |
| Stressed | Venlafaxine | Baseline | 340 | Week 2 | 340 | Week 7 | 360 |
| Stressed | Venlafaxine | Baseline | 300 | Week 2 | 300 | Week 7 | 310 |
| Stressed | Venlafaxine | Baseline | 340 | Week 2 | 345 | Week 7 | 365 |
| Stressed | Venlafaxine | Baseline | 335 | Week 2 | 345 | Week 7 | 365 |
